# Supplementary material for: High Fructose‐Induced Hypertension and Renal Damage Are Exaggerated in Dahl Salt‐Sensitive Rats via Renal Renin‐Angiotensin System Activation
Source: PubMed Central journal article supplement — J Am Heart Assoc. 2021 Jul 14;10(14):e016543. doi: 10.1161/JAHA.120.016543 (PMC8483472; doi:10.1161/jaha.120.016543), 2021-07-14
Supplement: JAH3-10-e016543-s001.pdf [file JAH3-10-e016543-s001.pdf]

# **SUPPLEMENTAL MATERIAL**

**TableS1. Impacts of diet and rat strain on urinary parameters, renal histology and expression of renal RAS components**

|                                               | <b>Diet</b> | <b>Strain</b> | <b>Interaction</b> |
|-----------------------------------------------|-------------|---------------|--------------------|
| <b>Urinary albumin excretion</b>              | <0.05       | n.s.          | <0.05              |
| <b>Urinary L-FABP excretion</b>               | <0.05       | <0.05         | n.s.               |
| <b>Index of glomerular sclerosis</b>          | <0.05       | <0.05         | n.s.               |
| <b>Desmin positive area</b>                   | <0.05       | <0.05         | <0.05              |
| <b>Media/lumen ratio</b>                      | <0.05       | <0.05         | <0.05              |
| <b>Relative interstitial volume</b>           | <0.05       | <0.05         | <0.05              |
| <b>Angiotensinogen</b>                        | n.s.        | n.s.          | n.s.               |
| <b>Renin</b>                                  | n.s.        | <0.05         | <0.05              |
| <b>Angiotensin converting enzyme</b>          | <0.05       | <0.05         | n.s.               |
| <b>Angiotensin converting enzyme activity</b> | <0.05       | <0.05         | <0.05              |
| <b>(Pro)renin receptor</b>                    | <0.05       | <0.05         | n.s.               |
| <b>Angiotensin II type 1 receptor</b>         | n.s.        | <0.05         | <0.05              |
| <b>Angiotensin II type 2 receptor</b>         | n.s.        | <0.05         | <0.05              |

n.s. no significance.

**Table S2. Effects of enalapril and candesartan on body weight and plasma parameters in control diet-fed Dahl salt-sensitive rats**

|                                  | Con         | Con-Ena      | Con-Can       |
|----------------------------------|-------------|--------------|---------------|
| <b>Body weight(g)</b>            | 398 ± 6     | 392 ± 7      | 395 ± 5       |
| <b>Triglyceride (mg/dL)</b>      | 267 ± 27    | 226 ± 33     | 259 ± 18      |
| <b>Total cholesterol (mg/dL)</b> | 76 ± 1      | 57 ± 2**     | 74 ± 2        |
| <b>Free fatty acid (mEq/L)</b>   | 218 ± 16    | 325 ± 11**   | 292 ± 20*     |
| <b>Glucose (mg/dL)</b>           | 152 ± 9     | 175 ± 4      | 173 ± 3       |
| <b>Creatinine (mg/dL)</b>        | 0.35 ± 0.02 | 0.33 ± 0.01  | 0.32 ± 0.01   |
| <b>Uric acid (mg/dL)</b>         | 1.64 ± 0.05 | 1.43 ± 0.10  | 1.36 ± 0.04** |
| <b>CCr (ml/min)</b>              | 3.03 ± 0.16 | 2.95 ± 0.11  | 3.16 ± 0.09   |
| <b>Renin activity (ng/mL/hr)</b> | 5.7 ± 0.8   | 50.0 ± 5.6** | 59.7 ± 4.3**  |

Con, control diet-fed Dahl salt-sensitive rats(n=6) ; Con-Ena, enalapril-treated and control diet-fed Dahl salt-sensitive rats(n=6) ; Con-Can, candesartan-treated and control diet-fed Dahl salt-salt sensitive rats(n=6) . HOMA-IR, homeostasis model assessment for insulin resistance; CCr, creatinine clearance. Data are presented as means±SE. \*P<0.05, \*\*P<0.01 compared with the Con group.

**Table S3. Effects of hydralazine and hydrochlorothiazide on body weight and plasma parameters in high fructose-fed Dahl salt-sensitive rats**

|                                  | Con         | HFr           | HFr-Hyd        | HFr-HCTZ       |
|----------------------------------|-------------|---------------|----------------|----------------|
| <b>Body weight(g)</b>            | 398 ± 6     | 397 ± 6       | 372 ± 6 *#     | 383 ± 5        |
| <b>HOMA-IR</b>                   | 0.56 ± 0.04 | 0.70 ± 0.04*  | 0.69 ± 0.02*   | n.d.           |
| <b>Triglyceride (mg/dL)</b>      | 267 ± 27    | 882 ± 49**    | 595 ± 67**##   | 816 ± 53 **    |
| <b>Total cholesterol (mg/dL)</b> | 76 ± 1      | 105 ± 2**     | 89 ± 2 **##    | 97 ± 5 **      |
| <b>Free fatty acid (mEq/L)</b>   | 218 ± 16    | 386 ± 37**    | 235 ± 19 ##    | 292 ± 22 *     |
| <b>Glucose (mg/dL)</b>           | 152 ± 9     | 194 ± 8**     | 185 ± 5 **     | 183 ± 6 **     |
| <b>Creatinine (mg/dL)</b>        | 0.35 ± 0.02 | 0.22 ± 0.02** | 0.27 ± 0.01**  | 0.25 ± 0.01 ** |
| <b>Uric acid (mg/dL)</b>         | 1.64 ± 0.05 | 2.13 ± 0.08** | 1.65 ± 0.06 ## | 1.88 ± 0.06 *  |
| <b>CCr (ml/min)</b>              | 3.03 ± 0.16 | 3.91 ± 0.27*  | 4.43 ± 0.43*   | 2.93 ± 0.19 #  |

Con, control diet-fed Dahl salt-sensitive rats (n=6) ; HFr, high fructose -fed Dahl salt-sensitive rats (n=6) ; HFr-Hyd, hydralazine-treated and high fructose-fed Dahl salt-sensitive rats (n=6) ; HFr-HCTZ, hydrochlorothiazide -treated and high fructose-fed Dahl salt-sensitive rats (n=6). CCr, creatinine clearance; n.d., not determined. Data are presented as means±SE. \*P<0.05, \*\*P<0.01 compared with the Con group; #P<0.05, ##P<0.01 compared with the HFr group.

Figure S1. Effects of enalapril (Ena) and candesartan (Can) of Control diet-fed DS rats.

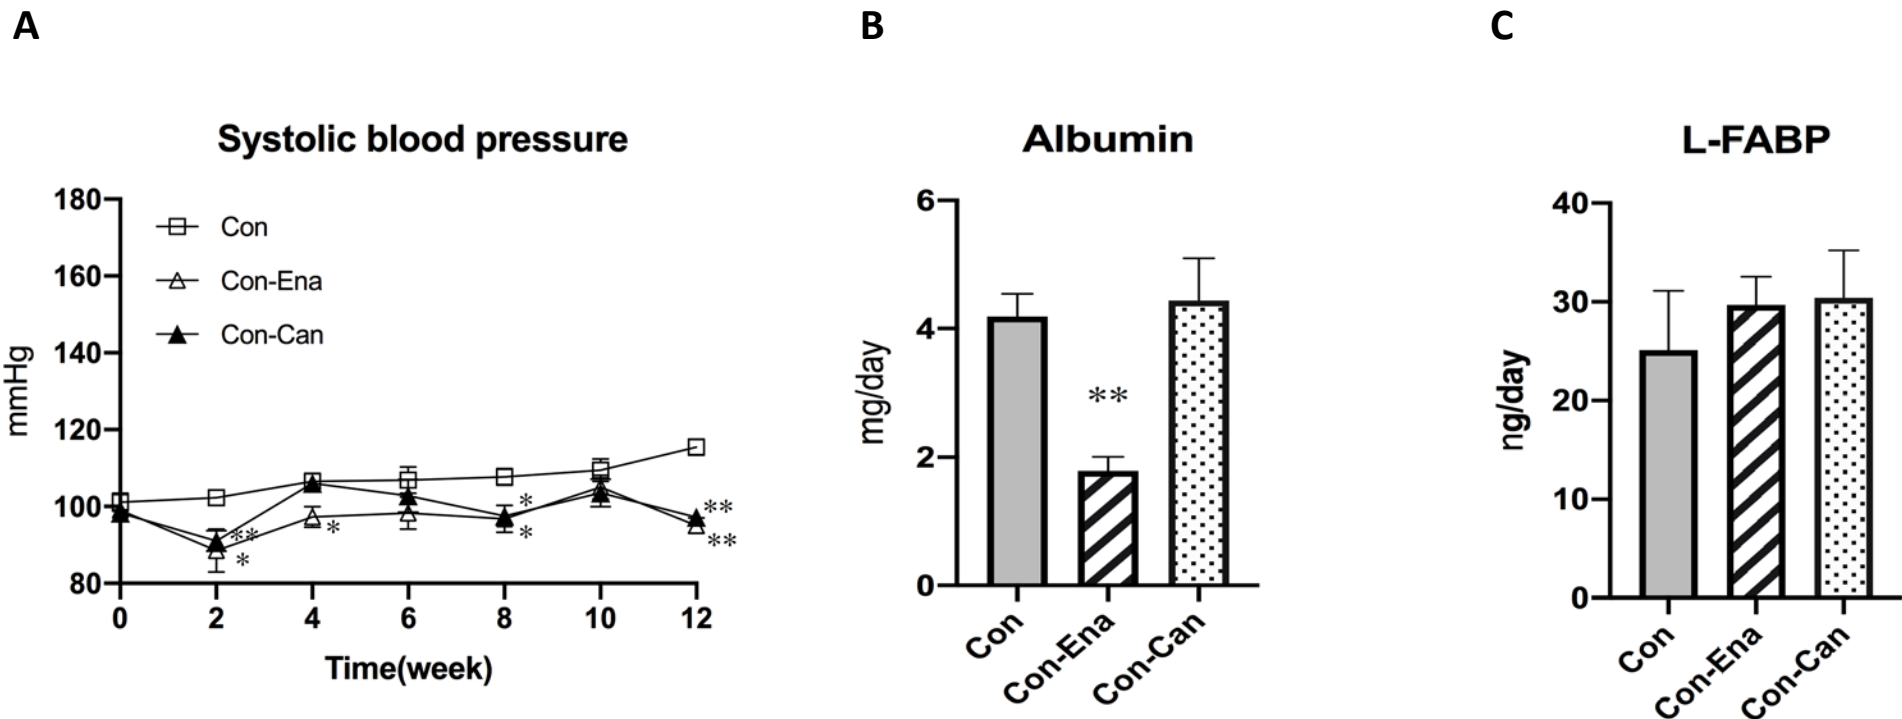

(A) systolic blood pressure, (B) urine albumin excretion and (C) urinary liver type-fatty acid binding protein(L-FABP) excretion were examined in the control group(Con)(n=6) , Con-Ena(n=6) ,and Con-Can(n=6) groups. Data are presented as means  $\pm$  SE . \*P<0.05, \*\*P<0.01 compared with the Con group.

**Figure S2. Effects of enalapril(Ena) and candesartan(Can) on the expression of renin-angiotensin system(RAS) components in the renal cortex of control diet(Con)-fed DS rats.**

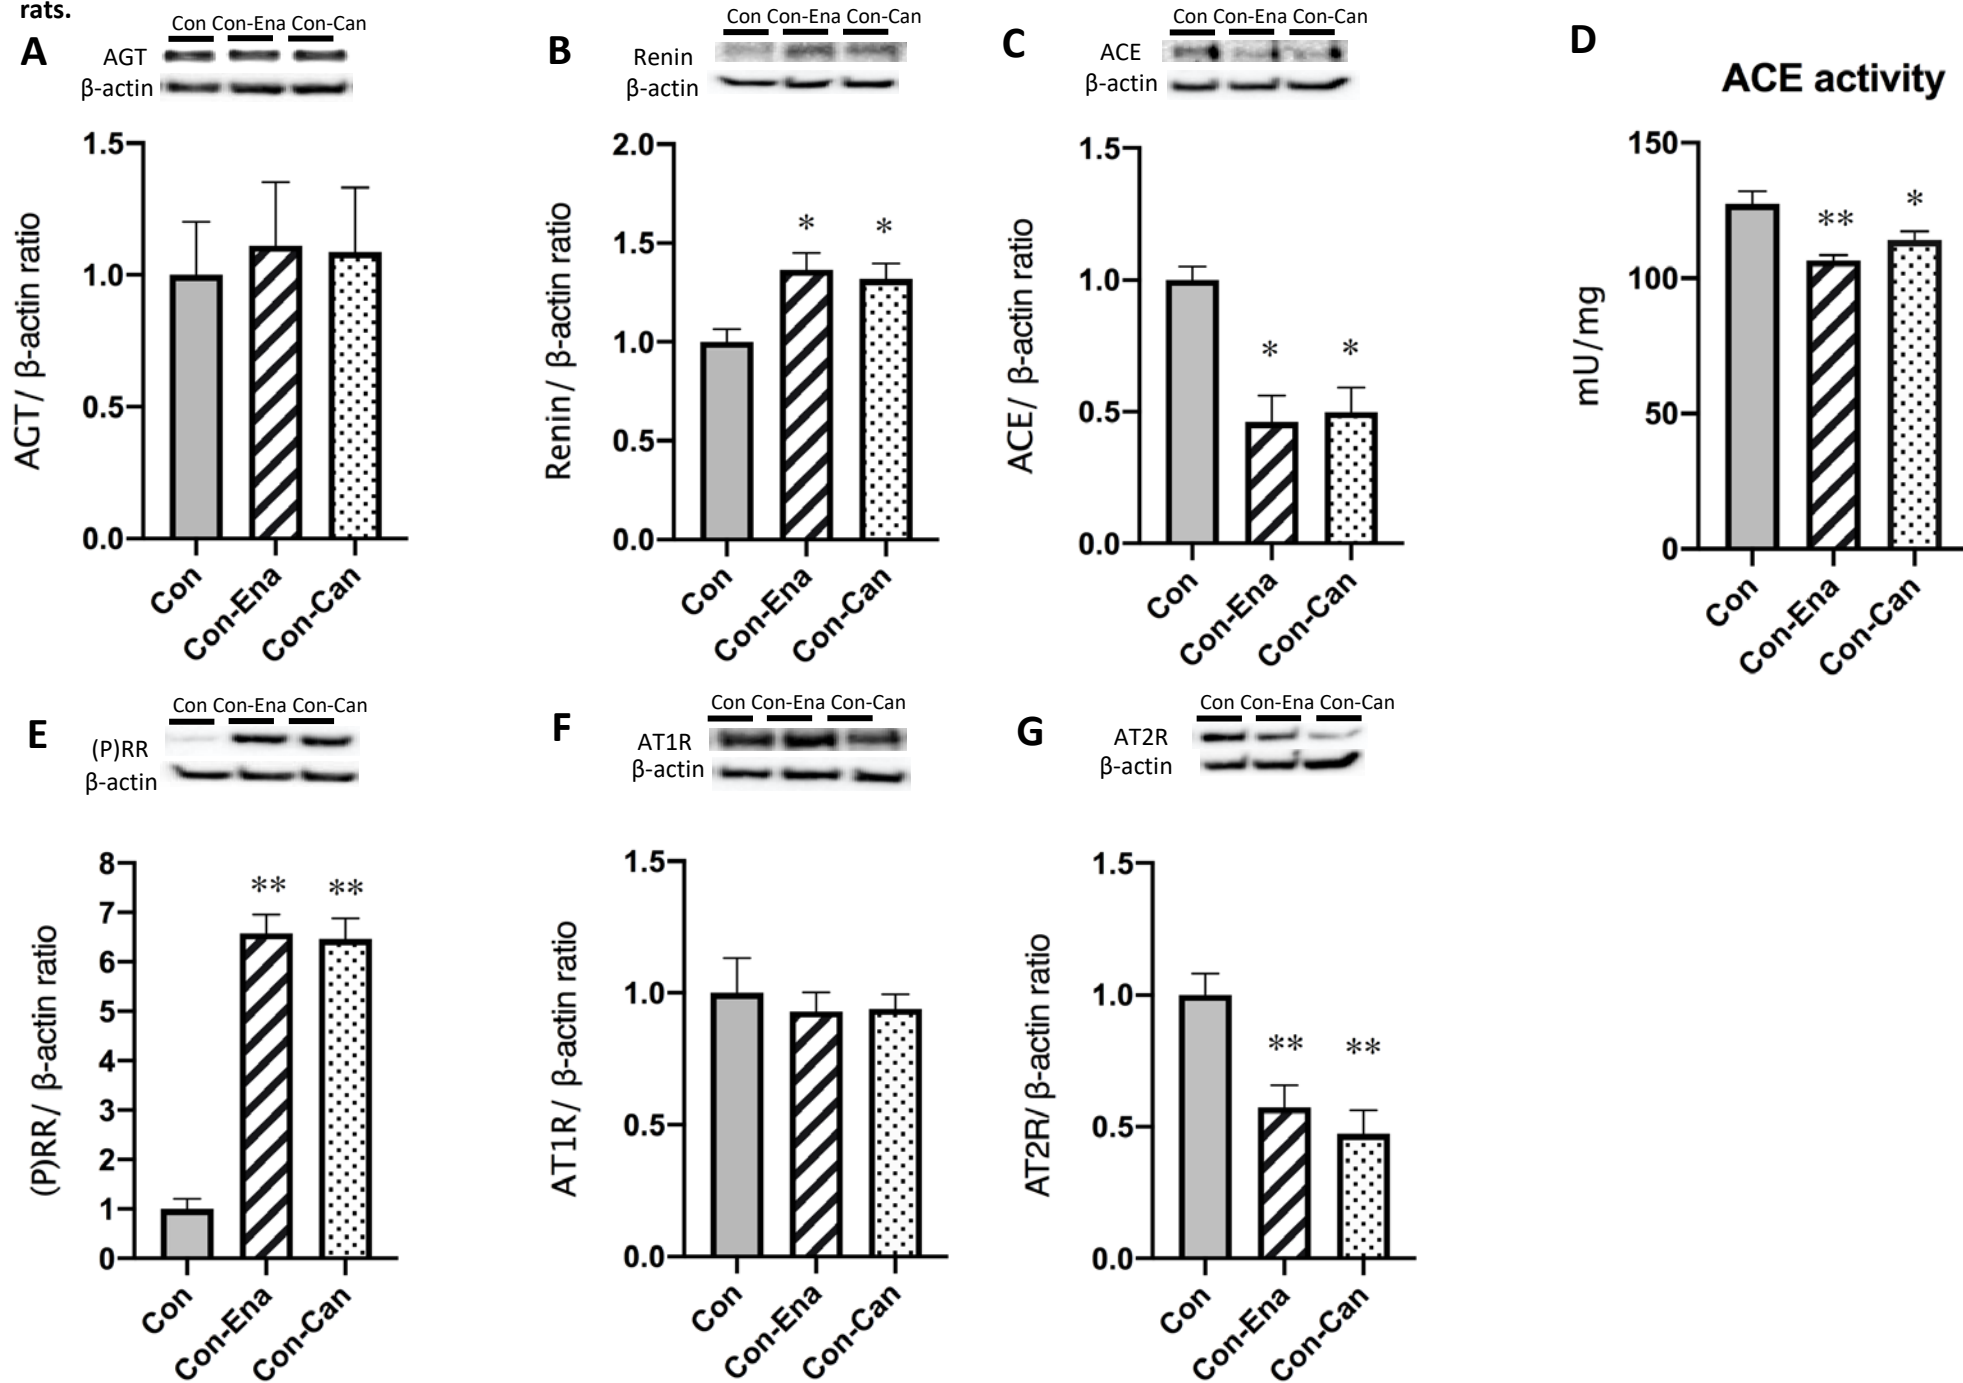

(A)Angiotensinogen(AGT), (B) renin, (C) angiotensin converting enzyme(ACE), (E) (pro)renin receptor((P)RR), (F) angiotensin II type 1 receptor(AT1R), (G)angiotensin II type 2 receptor(AT2R) protein expression was examined by western blot analysis, and (D)renal ACE activity was examined in the Con (n=6), Con-Ena (n=6) ,and Con-Can (n=6) groups. Top panels depict representative immunoblots from the different groups. The intensities of each specific protein band were normalized to that of  $\beta$ -actin, and the mean intensities of the values for the Con group. Data are presented as means  $\pm$  SE. \*P<0.05, \*\*P<0.01 compared with the Con group.

Figure S3. Effects of Hydralazin(Hyd) and hydrochlorothiazide (HCTZ) of high fructose diet (HFr)-fed DS rats.

**A**

**Systolic blood pressure**

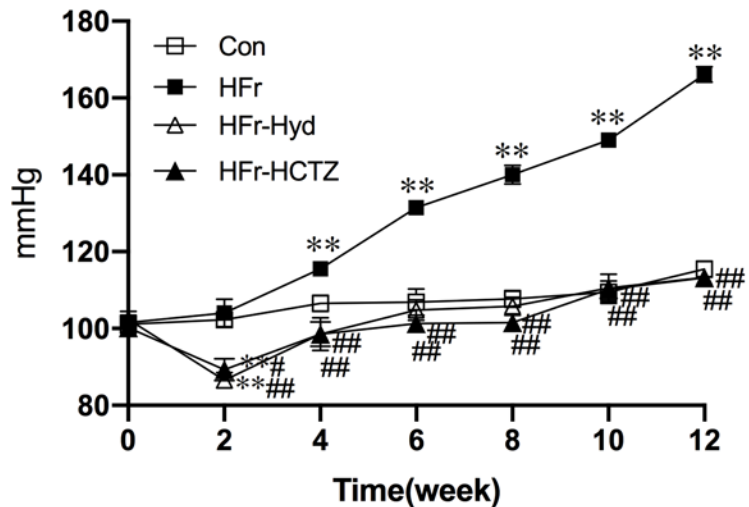

**B**

**Albumin**

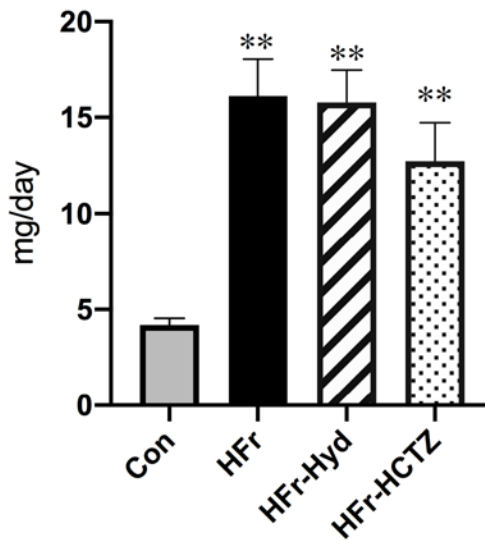

**C**

**L-FABP**

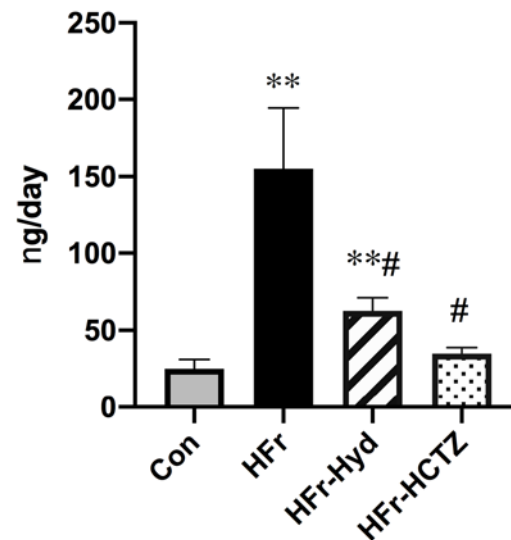

**D**

**Glomerular sclerosis**

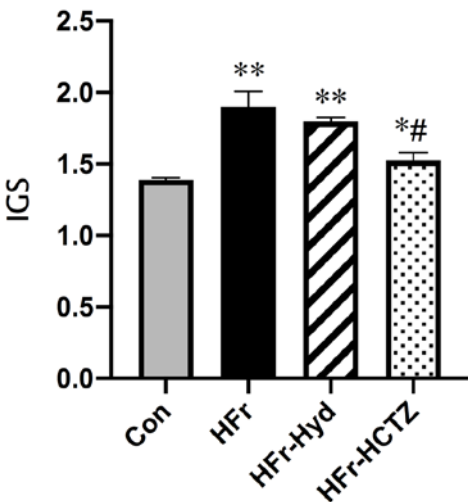

**E**

**Podocyte injury**

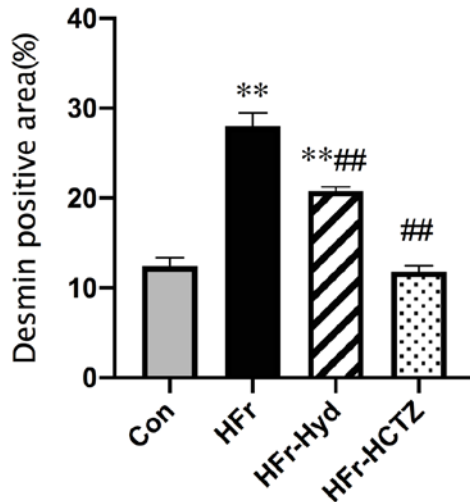

**F**

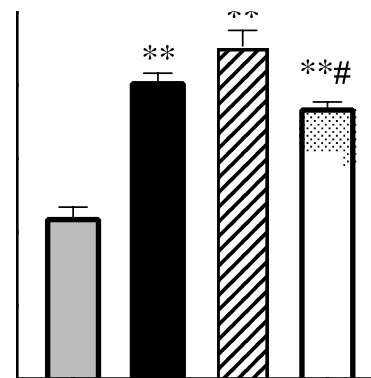

**G**

**Interstitial fibrosis**

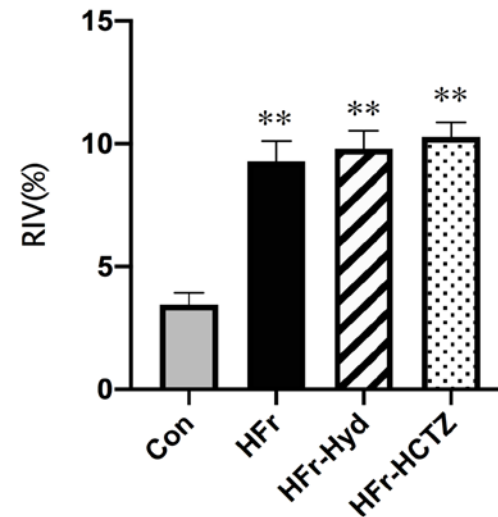



(A) systolic blood pressure, (B) urine albumin excretion and (C) urinary liver type fatty acid binding protein(L-FABP), (D) glomerular sclerosis, (E)podocyte injury, (F) arteriolar thickening, and (G) interstitial fibrosis were examined in the control(Con) (n=6), HFr (n=6), HFr-Hyd (n=6) and HFr-HCTZ (n=6) groups. . Data are presented as means  $\pm$  SE. \*P<0.05, \*\*P<0.01 compared with the Con group; #P<0.05, ##P<0.01 compared with the HFr group.
